# Supplementary material for: Besnoitia besnoiti infection alters both endogenous cholesterol de novo synthesis and exogenous LDL uptake in host endothelial cells
Source: PubMed Central journal article supplement (PMC6491585; doi:10.1038/s41598-019-43153-2), 2019-04-30

## Supplementary Information

### ***Besnoitia besnoiti* infection alters both endogenous cholesterol *de novo* synthesis and exogenous LDL uptake in host endothelial cells**

Liliana M. R. Silva, Dieter Lütjohann, Penny Hamid , Zahady D. Velasquez, Katharina Kerner, Camilo Larrazabal, Klaus Failing, Carlos Hermosilla, Anja Taubert

**Figure S1.** Immunofluorescence analysis of filipin III. BUVEC monolayers ( $n = 3$ ) were stained with filipin and single cell fluorescence intensity measurements were performed comparing non-infected (orange arrows) with *B. besnoiti*-infected (white arrows) cells. **(A)** Phase contrast, **(B)** filipin III and **(C)** merge.

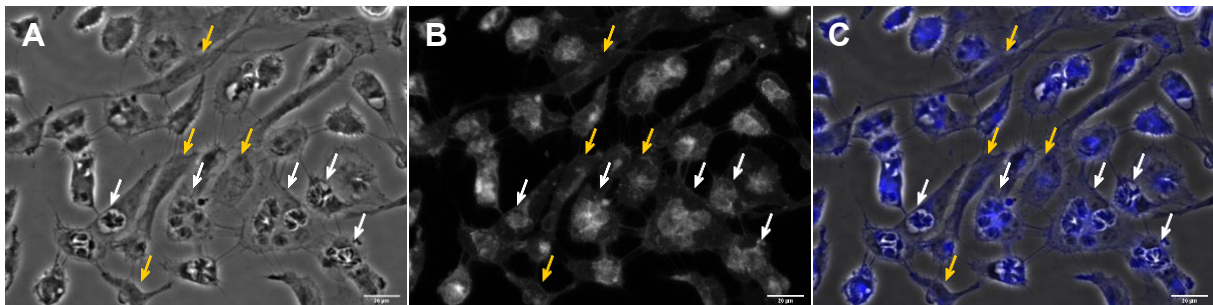

**Figure S2.** Immunofluorescence analysis of Nile Red. BUVEC monolayers ( $n = 3$ ) were stained with Nile Red and single cell fluorescence intensity measurements were performed comparing non-infected (orange arrows) with *B. besnoiti*-infected (white arrows) cells. (A) Phase contrast, (B) Nile Red and (C) merge.

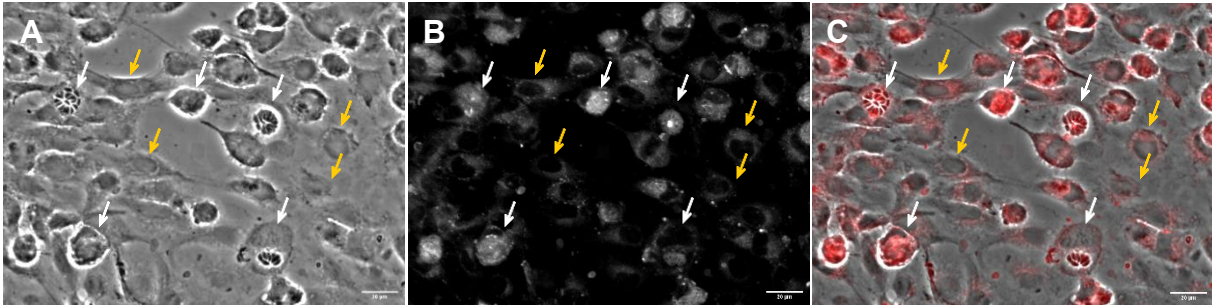

**Figure S3.** Viability assays performed with all used inhibitors in non-infected BUVEC and their effect on cell viability after 72h incubation. (A) Solvent controls, (B) CI976, (C) C75, (D) lovastatin and (E) zaragozic acid.

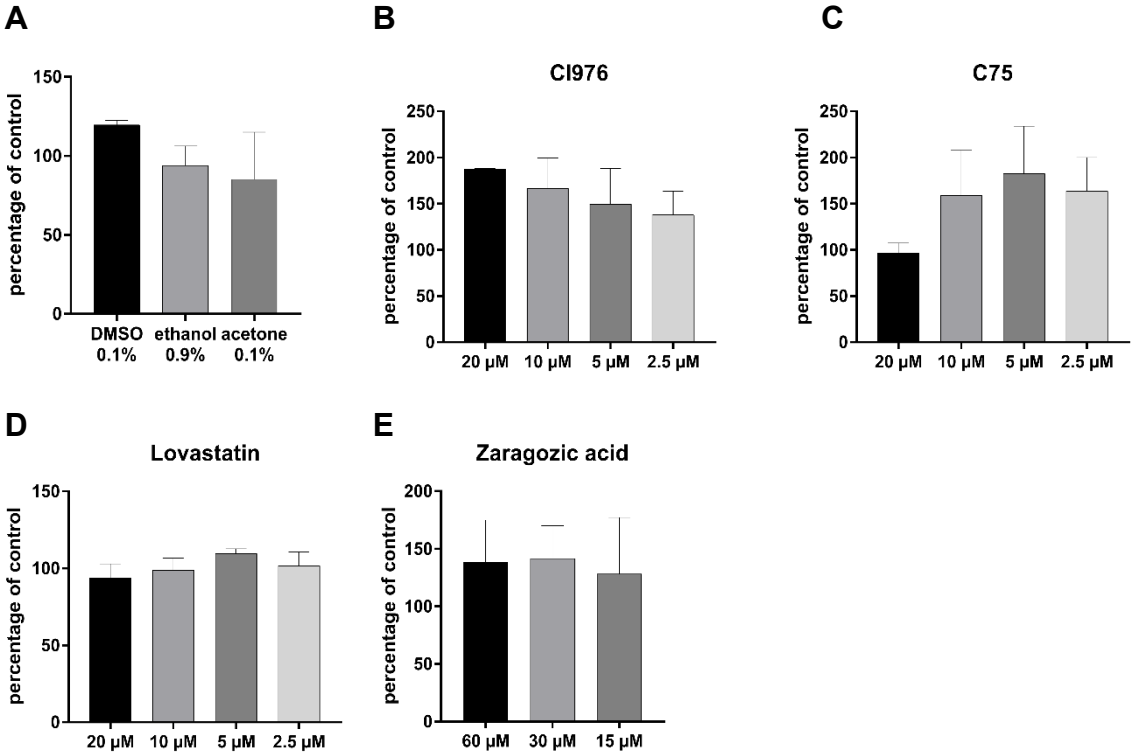

**Figure S4.** Raw data of immunoblots. **(A)** Original un-cropped Western blot detecting LDLR (92 kDa). **(B)** Original Western blot detecting vinculin (130 kDa). This membrane was cropped before immunodetection and assayed for proteins of different masses. The blots in **(A)** and **(B)** were cropped and shown in the Figure 6C.

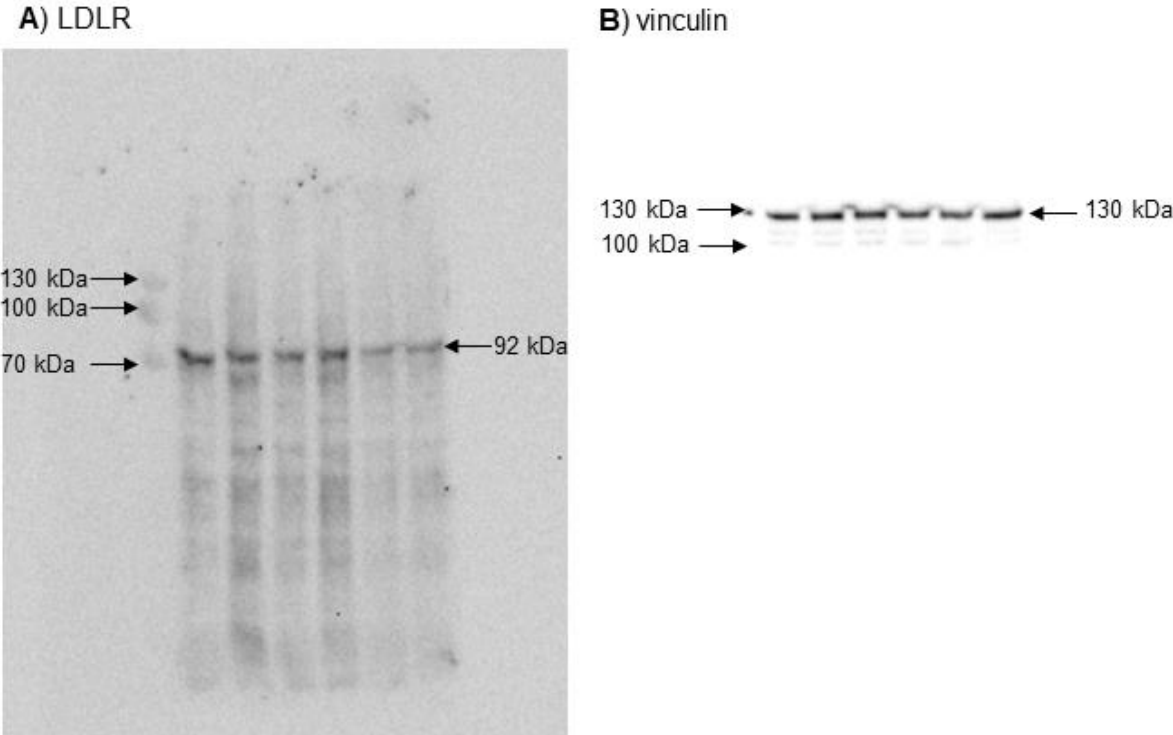

Supplement: 41598_2019_43153_MOESM1_ESM.pdf [file 41598_2019_43153_MOESM1_ESM.pdf]
